1 Can intraspecific variation in an herbivorous mite alter responses to  
2 drought-stressed host plant? A common garden experiment in the  
3 context of climate change

4

5 Alain Migeon, Philippe Auger, Odile Fossati, Ruth A. Hufbauer, Maëva Miranda, Ghais Zriki, Maria  
6 Navajas

7

8 Alain Migeon, CBGP, INRAE, CIRAD, IRD, Montpellier SupAgro, Univ Montpellier, Montpellier, France.

9 Philippe Auger, CBGP, INRAE, CIRAD, IRD, Montpellier SupAgro, Univ Montpellier, Montpellier,

10 France.

11 Odile Fossati, CBGP, IRD, INRAR, CIRAD, Montpellier SupAgro, Univ Montpellier, Montpellier, France.

12 Ruth A. Hufbauer, Department of Agricultural Biology and Graduate Degree Program in Ecology,

13 Colorado State University, Fort Collins, CO, USA.

14 Maëva Miranda, CBGP, INRAE, CIRAD, IRD, Montpellier SupAgro, Univ Montpellier, Montpellier,

15 France & CIRAD, UMR AGAP INSTITUT, F-34398 Montpellier, France.

16 Ghais Zriki, CBGP, INRAE, CIRAD, IRD, Montpellier SupAgro, Univ Montpellier, Montpellier, France &

17 CEFE, Univ Montpellier, CNRS, EPHE, IRD, Univ Paul Valéry Montpellier 3, Montpellier, France.

18 Maria Navajas, CBGP, INRAE, CIRAD, IRD, Montpellier SupAgro, Univ Montpellier, Montpellier,

19 France.

20

## 21 **Abstract**

22

23 The effects of drought stress on plants and phytophagous arthropods are topics currently extensively  
24 investigated in the context of climate change. Drought not only impacts cultivated plants but also  
25 their parasites, which in some cases are favoured by drought. It represents a major challenge that  
26 agriculture is facing in a perspective of intensification of drought. Direct effects of drought on  
27 herbivorous arthropods typically produce bigger offspring and faster development but attractiveness  
28 can also occur. However, how much responses to abiotic factors differ among populations of a  
29 species remains poorly documented. The impact of drought-stressed plants on key life-history  
30 parameters is here investigated for a major agricultural pest, the two spotted spider mite,  
31 *Tetranychus urticae*, depending on the climatic conditions of the localities at origin. Sampled  
32 localities represent a rather wide range of core climate conditions across the mite's native  
33 distribution area with contrasting climatic profiles, ranging from wet temperate to cool Atlantic  
34 localities to medium to dry hot Mediterranean localities. Plant drought stress effects on mites was  
35 estimated by measuring four life history traits: development time, fecundity, sex-ratio and  
36 emigration rate in a common garden experiment made of two modalities: well-watered and drought-  
37 stressed bean plants. Mites feeding on drought-stressed plants displayed shorter developmental  
38 time and attempted to leave leaf patches less often, and young females were more fecund. The  
39 mites originating from wet temperate to cool Atlantic localities respond more strongly to drought  
40 than mites originating from medium to dry hot Mediterranean localities, suggesting local adaptation  
41 of *T. urticae* populations to various aridity values and indicates that mite feeding behaviour is shaped  
42 by the climatic conditions they faced in the area of origin.

43

44

## 45 **Keyword**

46

47 *Acari*; *Tetranychus urticae*; Europe; Mediterranean; local adaptation; common garden experiment;  
48 life-history traits

49

## 50 Introduction

51

52 “A Quarter of Humanity Faces Looming Water Crises”, that was the title of an article in The New York  
53 Times of August 6<sup>th</sup>, 2019 (Sengupta and Cain, 2019). It is a fact that drought is a major challenge  
54 around the World, with 17 countries facing extreme water shortages. One of the major  
55 consequences of water shortage, in addition to its impact on human survival and health, is the  
56 impact it has on agriculture. Many cities in the global South (Mitlin et al. 2019) face water shortages,  
57 which is leading to conflicts between immediate human needs and agriculture. Agricultural  
58 production currently represents 70% of the overall water consumption worldwide (OECD,  
59 <https://www.oecd.org/agriculture/topics/water-and-agriculture/>) and projections for 2050 indicate  
60 water use in agriculture will increase. Low water availability not only impacts cultivated plants but  
61 also their parasites, which in some cases are favoured by drought (Showler, 2013). Thus, both water  
62 availability and pests are major agricultural challenges that are increasing because of global change  
63 and the resulting intensification of drought.

64

65 Understanding the effects of drought and more precisely drought stress on plants and phytophagous  
66 organisms is important to supporting future agricultural production. Chaves et al. (2003) reviewed  
67 how drought affects plants physiology and Showler (2013) and Hummel et al. (2010) documented  
68 changes in the amino-acids and free sugar balances in drought-stressed plants. The impact of  
69 drought on plant-associated fauna has been documented at the population level. For example, Dale  
70 & Frank (2017) observed that fitness of scale insects increased on drought-stressed urban maple  
71 trees relative to well-watered trees. Effects of drought stress on herbivorous arthropods organisms  
72 has been also quantified experimentally. For example, drought stress in beans increased oviposition  
73 by the bug *Orius insidiosus* (Seagrave et al., 2011) and drought stress in the grass *Holcus lanatus*  
74 increased offspring and rates of emergence of the moth *Spodoptera littoralis* increasing their fitness  
75 overall relative to well-watered plants (Walter et al. 2012). Field and laboratory observations of  
76 spider mites have revealed diverse and sometimes divergent results. Drought stress of soybeans led  
77 to faster development and thus increased density of the spider mite *Tetranychus turkestanii* (Nikolova  
78 et al. 2014). This pattern was also observed in *Tetranychus urticae* and *Oligonychus pratensis* on  
79 maize (Chandler et al. 1979), and in a mixed mite population (75% of *Tetranychus pacificus* and 25%  
80 of *Panonychus citri*) on almond (Youngman & Barnes, 1986; Youngman et al., 1988). Gillman et al.  
81 (1999) observed that the damage caused by *T. urticae* increased on drought stressed buddleia plants.  
82 Ximénez-Embun et al. (2016, 2017a, 2017b) observed a global increase of performance of three  
83 important tomato mite pests, *Tetranychus evansi*, *T. urticae* and *Aculops lycopersici*, reared on

84 drought-stressed tomato plants, especially for tomato-adapted strains in the case of *T. urticae*. A  
85 non-linear response with an increase of density and fecundity of this mite was reported at an  
86 intermediate level of drought, and a linear increase of development rate at a severe drought stress  
87 regime (English-Loeb, 1989). In contrast, the opposite pattern was reported by Oloumi-Sadeghi et al.  
88 (1988) who observed a decrease of *T. urticae* abundance on drought-stressed soybean and by Sadras  
89 et al. (1998) for *T. urticae* on cotton.

90

91 The degree to which different populations of a phytophagous arthropods differ in responses to  
92 abiotic factors remains poorly documented. However, adaptation and phenotypic plasticity are  
93 regarded as main way that organisms respond to changing environments (Bowman et al. 2018). For  
94 example, Kelley et al. (2011) reported a latitudinal and temperature-linked gradient increasing  
95 maximum thermal tolerance of the crab *Carcinus maenas* populations from coldest to warmest  
96 localities Among the tetranychids mites, common garden experiments revealed a latitudinal gradient  
97 of life history traits (fecundity, development time, sex-ratio and dispersal) from Western European  
98 core distribution of *T. urticae* to the northernmost part of the distribution area (Van Petegem et al.  
99 2016). Diapause as a means of cold avoidance is another trait that varies according to the climate the  
100 mite experiences. For example, Koveos et al. (1993) reported a gradient of diapause duration linked  
101 to latitude and altitude in *T. urticae* where Japanese alpine populations displayed similar traits than  
102 the most northern mites indicating the importance of temperature on regulation of this trait.  
103 Similarly, Takafuji et al. (1991) also in *T. urticae* and Suwa & Gotoh (2006) in *Tetranychus pueraricola*,  
104 observed a South-North gradient in the diapause induction of these two species along the Japanese  
105 archipelago.

106

107 Thus, intraspecific variation is common in many organisms. Drought stress also varies historically in  
108 different geographic origins, and is becoming more common in some regions due to climate change  
109 Here, we explore how drought stress in host plants affects different populations of an herbivorous  
110 mite that is a major plant pest, the two spotted spider mite, *T. urticae*. This work focuses on if and  
111 how responses depend on the geographic origin of the mites.

112

## 113 **Material and methods**

114

115 The effect of plant drought stress on mites was estimated by measuring four life history traits in two  
116 common garden experiments, each using well-watered and drought-stressed bean plants. We  
117 measured development time of females (experiment I) and fecundity, leaving rates and sex ratio of  
118 progeny (experiment II). *Tetranychus urticae* is an arrhenotokous mite, and sex ratio represents a way  
119 to respond to changing environments (Crozier, 1985).

120

### 121 **1 Mite material**

122 **Origin of mites.** *Tetranychus urticae* populations (green and red forms - Auger et al. 2013) originating  
123 from 12 different locations in Europe were chosen to provide diversity in our experiments (Table 1,  
124 Figure 1). Among the localities sampled, Greece, Cyprus and to a lesser extent Spain and Italy  
125 correspond to places with dry hot summers while France and United-Kingdom correspond to wet hot  
126 summer to medium summer.

127

Table 1: Characteristics of the populations of *Tetranychus urticae* used in the common garden experiments.

| Mite population | Country | Locality     | Latitude (DD) | Longitude (DD) | Mite body color | Host plant name             |
|-----------------|---------|--------------|---------------|----------------|-----------------|-----------------------------|
| IT-I            | Italy   | Lerici       | 44.086        | 9.889          | Red             | <i>Convolvulus arvensis</i> |
| SP-I            | Spain   | Palafolls    | 41.671        | 2.758          | Red             | <i>Phaseolus vulgaris</i>   |
| CY-I            | Cyprus  | Paralimni    | 35.050        | 33.990         | Red             | <i>Convolvulus arvensis</i> |
| CY-II           | Cyprus  | Kouklia      | 34.693        | 32.578         | Green           | <i>Convolvulus arvensis</i> |
| CY-III          | Cyprus  | Kouklia      | 34.693        | 32.578         | Green           | <i>Malva sp</i>             |
| GR-I            | Greece  | Karystos     | 38.027        | 24.404         | Green           | <i>Malva sp</i>             |
| GR-II           | Greece  | Karystos     | 38.027        | 24.404         | Green           | <i>Xanthium italicum</i>    |
| UK-I            | U-K     | East-Mailing | 51.285        | 0.448          | Green           | <i>Urtica dioica</i>        |
| FR-IV           | France  | Cappy        | 49.928        | 2.783          | Green           | <i>Solanum tuberosum</i>    |
| FR-II           | France  | Burnhaupt    | 47.741        | 7.142          | Red             | <i>Urtica dioica</i>        |
| FR-III          | France  | Guewenheim   | 47.756        | 7.091          | Green           | <i>Urtica dioica</i>        |
| FR-I            | France  | Livron       | 43.227        | -0.139         | Red             | <i>Urtica dioica</i>        |
| FR-V            | France  | Salies       | 43.464        | -0.916         | Green           | <i>Urtica dioica</i>        |

129

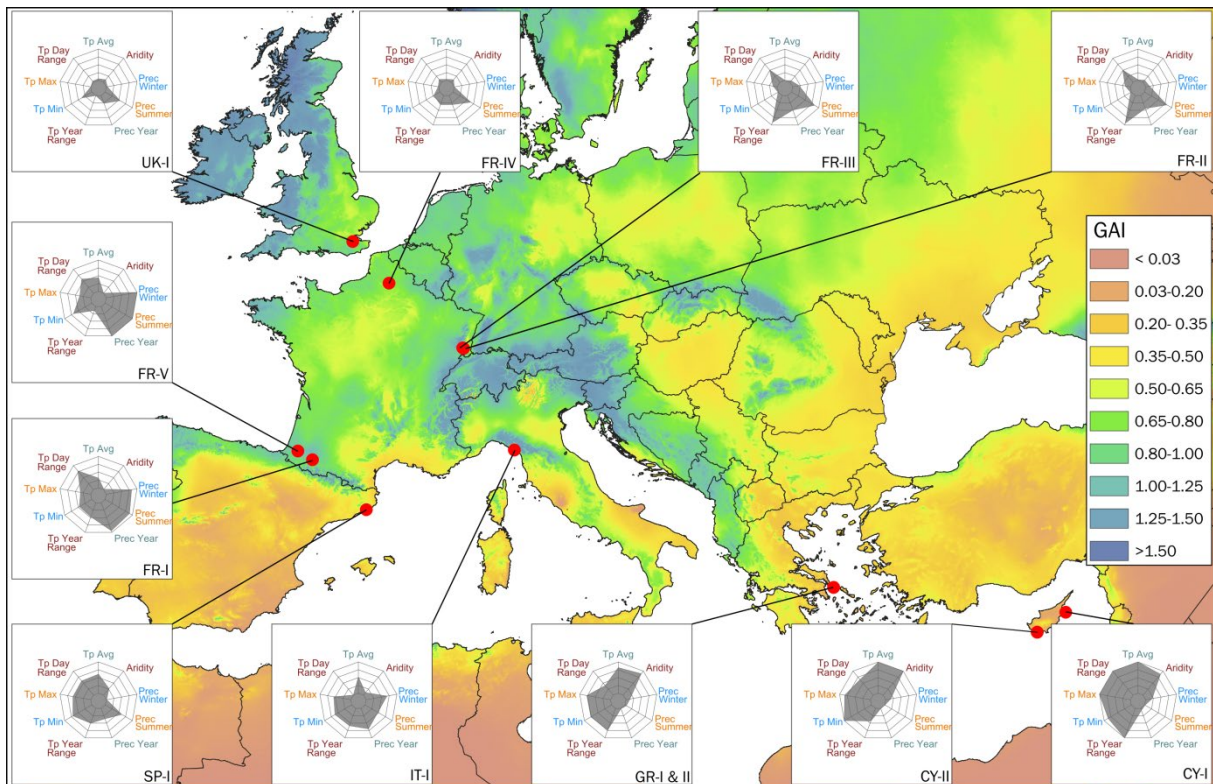

130

131

132 Figure 1. Map of the localities sampled. The background colour is scaled on Global Aridity Index

133 (Trabucco & Zomer, 2019). The radar charts display the values of some important climatic

134 variables: (from top, clockwise) annual temperature average (Tp Avg), 1/global aridity index

135 (Aridity), precipitations of the coldest quarter (Prec Winter), precipitations of the warmest quarter

136 (Prec Summer), total year precipitations (Prec Year), temperature annual range (Tp Year Range),

137 minimal temperature of the coldest month (Tp Min), maximal temperature of the warmest month

138 (Tp Max), mean diurnal range (Tp Day Range).

139

140 **Mite rearing.** Mite stock populations were maintained separately on detached bean leaves (*Phaseolus*  
141 *vulgaris* cv Contender) placed on moist cotton blanket in double-bottom plastic boxes (13.5 x 9.5 x 5  
142 cm) with water reservoir and maintained in growth chambers at  $21 \pm 1$  °C,  $60 \pm 10$  % RH with a  
143 photoperiod of L/D 16/8 h. Each population was maintained for at least six generations before being  
144 used in the experiments. In experiment I, adult females of various ages were transferred directly to  
145 bean plants (see the experimental design description below and Fig.2A.). In experiment II (see  
146 experimental design and Fig. 2B), to have adult females of known age and to avoid possible variation  
147 in feeding history on fecundity we transferred females reared on detached leaves to drought-stressed  
148 or well-watered beans seedlings (according to the experimental treatment) and left to oviposit for 24  
149 h. These females were subsequently removed and laid eggs were allowed to develop to adult. This  
150 produced known age adult females were then used in experiment II.

151

## 152 **2 Plant material**

153 **Plant production.** French bean (*Phaseolus vulgaris* cv. Contender) plants were grown from seeds in 2  
154 L pots (diameter: 15 cm, height: 17 cm) (CEP, HR 17YPP) filled with 815 g (R.H. about 30%, measured  
155 with a soil moisture sensor HH150 (Delta-T Devices Ltd, Cambridge, UK)) of peat mix (Huminsubstrat  
156 N2, Neuhaus®, Klasmann-Deilmann, Geeste, Germany). Two sets of pots were differentiated according  
157 to the watering regime: well-watered plants (high water regime) were watered to saturation every day  
158 and drought-stressed plants (low water regime) were watered only once at seeding time with 200 ml  
159 of water. Pots were first kept in a regulated greenhouse with additional light when necessary ( $25 \pm 7$   
160 °C /  $40 \pm 30$  % RH) for ten days after sowing.

161 Ten days after sowing, bean seedlings (two expanded seed leaves) were transferred to a climatic  
162 chamber with diurnal ( $25 \pm 0.5$  °C) and nocturnal ( $23 \pm 0.5$  °C) temperatures and using a light cycle of  
163 L/D 16/8 h. Plants were watered differentially according to treatment in the climatic chambers as  
164 described below. Light was provided by agro red and blue LED lamps (Philipps Green Power LED).  
165 Relative humidity was not regulated but limited using an air dehumidifier (Rexair 2500T, Rexair, 95330  
166 Domont, France) and was  $50 \pm 20$  % RH.

167



168

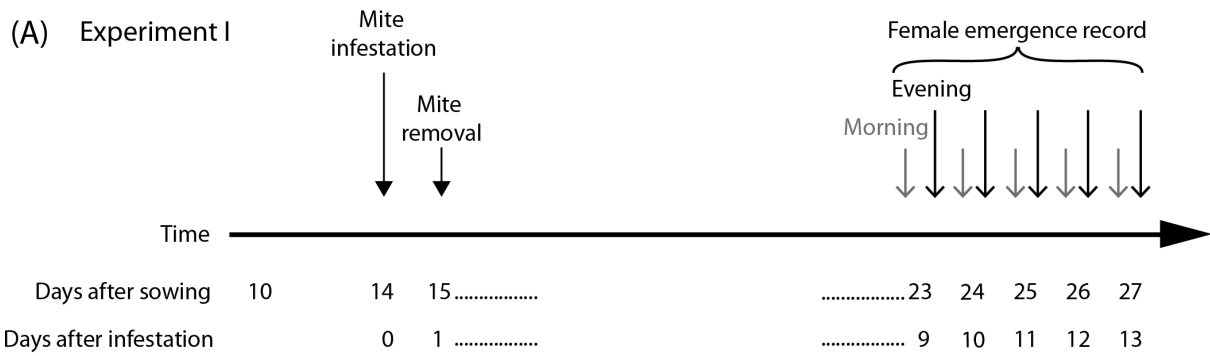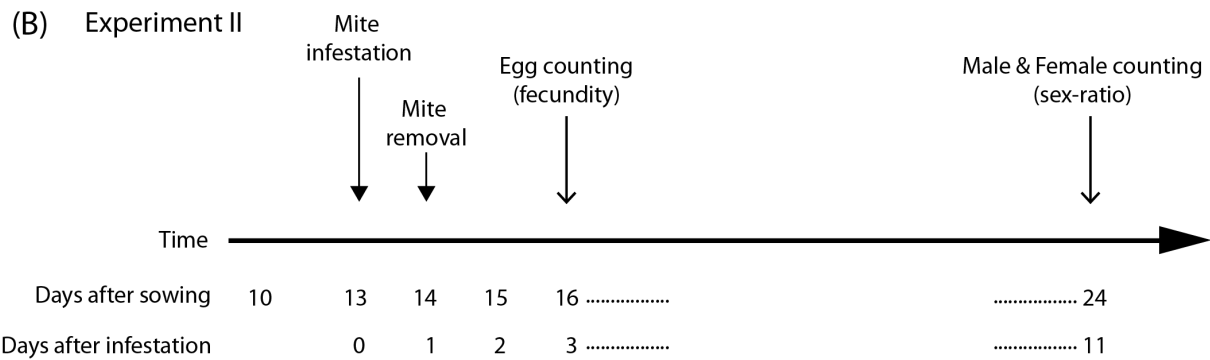

169

170 Figure 2. Assessment of development time in female mites in Experiment I (A); assessment of fecundity  
 171 and sex ratio in Experiment II (B).

172

173 **Drought stress maintenance and assessment.** After transferring bean seedlings from the greenhouse  
174 to the climatic chamber, these continued to be exposed to two different water regimes: either well-  
175 watered or drought-stressed regime. These two modalities corresponded to soil moisture maintained  
176 above 45% and between 10-8% (8% is over the wilting point), respectively. Plant watering was carried  
177 out in two ways depending on the experiment: (1) in experiment I, all water regimes were ensured  
178 using an automatically regulated drip irrigation system. Soil water content (RH) was measured using 5  
179 moisture sensors (SM150 with GP2 Data Logger, Delta-T Devices Ltd, Cambridge, UK) in each watering  
180 treatment and linked to DeltaLINK 3.1.1 PC software (Delta-T Devices Ltd, Cambridge, UK) for setting  
181 up and downloading data from a GP2 station. In the well-watered treatment, when the average soil  
182 moisture dropped to 45%, each plant was automatically watered for 30 seconds (delivering 17 ml of  
183 water) by a drip. In the drought-stressed treatment, watering was activated (same duration and  
184 amount of water per watering event) when soil moisture dropped to 8% (see Supplementary Figure 1  
185 as an example); (2) in the experiment II, plants were watered manually. For the well-watered regime,  
186 beans daily received 100 ml of water. In the drought-stressed regime, they received once 20 ml of  
187 water when transferred to the climatic chamber (10 days after sowing) with no water delivered until  
188 17 days after sowing; from when plants were daily watered with 20 ml of water.

189

190 Water stress level of plants was assessed several times during the experiments by measuring the  
191 following parameters: a) the leaf stomatal conductance (experiments I, II) reported to be a reliable  
192 drought indicator (Verslues et al., 2006), was assessed on 10 plants per water regime for each mite  
193 population tested using a leaf porometer (SC-1 Leaf Porometer, Decagon Devices, Inc., Pullman, WA,  
194 USA). For young seedlings, from 10 to 19 days after sowing, the sensor was placed head in the upper  
195 third of the seed leaf (the part closest to the petiole of the leaf), on the side of the leaf. For older  
196 seedlings, from 21 days after sowing and later, measurements were taken in the first trifoliate leaf,  
197 placing the sensor head on the side of the central leaflet; b) the soil moisture (experiment II) was  
198 assessed using a soil moisture sensor (HH150, Delta-T Devices Ltd, Cambridge, UK) and by weighing  
199 the pot (seedling, pit mix and pot) using a balance (KSR1 Proline, Darty Ptc©, UK).

200

### 201 **3 Experimental design**

202 Due to restricted space available, each population was assayed separately. All the experiments were  
203 conducted in a climate room with diurnal ( $25 \pm 1$  °C) and nocturnal ( $23 \pm 1$  °C) temperatures and using  
204 a light cycle of L/D 16/8 h. Relative humidity was maintained at  $50 \pm 20$  % RH using a dehumidifier  
205 (Rexair 2500T, Rexair, 95330 Domont, France).

206 **Experiment I (Figure 2A)**

207 Experiment I was designed to estimate the development time of mites. Well-watered and drought-  
208 stressed plants corresponding to 2 expanded simple leaves (cotyledons) stage, were randomly  
209 arranged in the climatic chamber and then infested with mites when steady stress conditions were  
210 reached in plants assigned to the drought-stressed treatment (Supplementary Figure S1). As shown in  
211 Figure S2, water-stress of bean seedlings was assessed at seven time-points throughout the experience  
212 from 11 to 27 days after sowing, by using 10 bean plants per watering regime.

213

214 For each population tested, 14 days after sowing plants were infested with females of unknown age  
215 (old females were excluded) from stock culture by gently transferring with a fine camel hairbrush 10  
216 females per plant (5 per each simple leaf) in a squared arena built on leaves upper surface (Figure 3).  
217 Each squared arena was delimited by four flexible PVC tape stripes (electrical insulation tape, Coteka,  
218 Chaulnes, France) of 50 x 7.5 mm forming an internal square about 18 cm<sup>2</sup> glued onto the leaf surface.  
219 To avoid mite losses, Vaseline (CAS 8009-03-8; Gifrer, Décines-Charpieu, France) mixed with 10%  
220 organic olive oil (Bio Classico, Carapelli Firenze SpA, Tavarnelle Val di Pesa, Firenze, Italy) was applied  
221 on the tape stripe to form a cord (that delimits a squared arena) that spider mites cannot cross.  
222 Females placed in these arenas were allowed to lay eggs for 24 hours and then removed (Figure 2A)  
223 using a Rena® vacuum. At this time, individuals were recorded as living, dead or drowned in the oily  
224 barrier. The mites found in the barrier were recorded to estimate attempts to leave the patch of leaf.  
225 Twelve to 15 replicates (12-15 plants) per water regime were performed for each mite population.  
226 From day 9 to 13 after infestation, newly emerged adult females were recorded and then removed  
227 twice a day, at 8 am and 4 pm (Figure 2A), using a stereomicroscope Leica EZ4 (Leica microsystems  
228 CMS GmbH, Wetzlar, Germany).

229

230

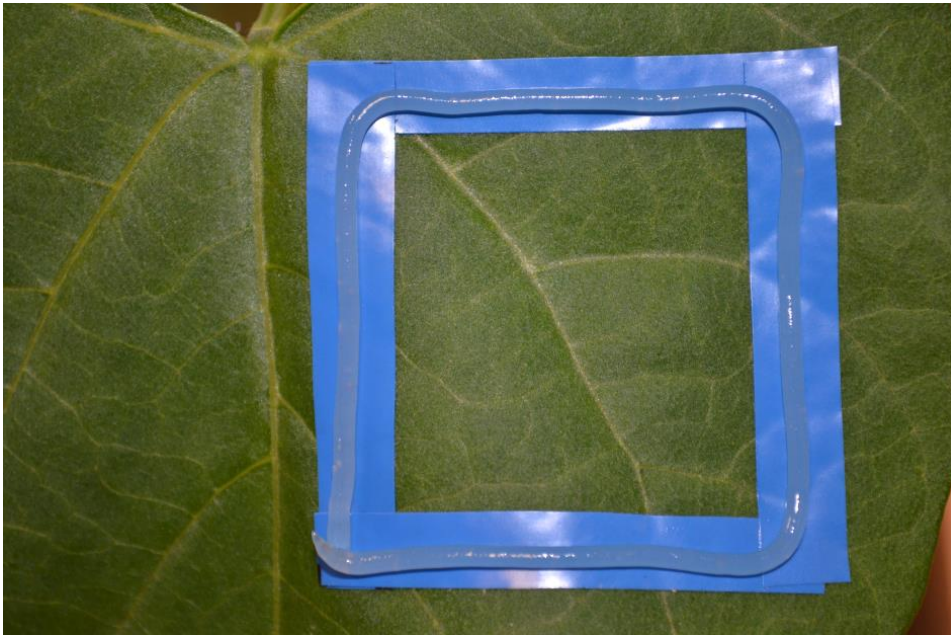

231

232

233 Figure 3. Mite confining arena built on bean leaf.

234

## 235 **Experiment II (Figure 2B)**

236 Experiment II was designed to assess the effect of plant drought stress on females' fecundity and on  
237 the sex ratio of their progeny. When drought stress conditions occurred in plants (Supplementary  
238 Figure 1) three days after their transfer in the climatic room (13 days after sowing), plants of both  
239 water regimes were infested with *T. urticae* females of specific ages collected from rearing plants. To  
240 simultaneously obtain females of known age in both watering modalities studied, the day of mite  
241 infestation of each treatment of rearing plants was calculated from the results of experiment I,  
242 resulting in simultaneous three-day-old females in both, well-watered and drought-stressed rearing  
243 plants. To ensure that the two watering modalities remained clearly distinct until the end of the  
244 experiment, water of bean seedlings stress was assessed as shown in Figures S3 and S4.

245

246 A first batch of plants was infested with three-day-old females and a second batch with nine-day-old  
247 females. Mites were reared on plant experiencing the same watering regime as the treatment they  
248 were transferred to. The procedures for plant infestation, mite confinement, and assessment of water  
249 status of plants were the same as those mentioned in experiment I, except water status assessment of  
250 plants which was also done by measuring the peat mix RH (%) and the weight of the pots on 10  
251 replicates per watering treatment.

252

253 Females were allowed to lay eggs for 24 h and subsequently removed using a Rena® vacuum. At this  
254 time, individuals were recorded as living, dead or drowned in the oily barrier. The mites found in the  
255 barrier were recorded to estimate attempts to leave the patch of leaf. Female fecundity was assessed  
256 by counting eggs two days after females were removed from arena with the aid of a stereomicroscope  
257 Leica® EZ4 (Leica Microsystems, Weltzar, Germany). The eggs were kept on plants until hatching and  
258 offspring allowed to development to adulthood. The sex-ratio of newly emerged adult mites was then  
259 assessed 11 days after mite infestation.

260

## 261 **4 Climate data and method of analysis**

262 Climate data were retrieved from WolrdClim (Fick & Hijmans, 2017) and CGIAR (Trabuco & Zomer,  
263 2019). We used monthly values of temperatures (minimum, maximum and average) to construct  
264 Gausse climatograms. The Bioclimatic variables gather a set of 19 synthetic variables describing the  
265 climate. The Global Aridity Index (GAI) developed to quantify the precipitation availability over  
266 atmospheric demand (Trabuco & Zomer, 2019), was also used here. This is a synthetic variable  
267 expressing the moisture availability for potential growth of reference vegetation.

268

269 The 19 Bioclimatic variables plus the Global Aridity Index were analysed via a principal component  
270 analysis followed by a hierarchical clustering on principle components to obtain a pattern of the  
271 climates encountered in the 12 mite sampling locations.

272

## 273 **5 Data analysis**

274 All data analyses were conducted using R 3.5 (R Core Team, 2018). Principal component analysis  
275 (PCA) and hierarchical clustering on principle components (HCPC) using Euclidian distances and  
276 Ward's clustering method were computed with the library FactoMineR (Lê et al., 2008). Graphics  
277 were produced using the libraries ggplot2 (Wickham, 2016) and factoextra (Kassambara & Mundt,  
278 2019).

279

280 The development time of mites was calculated by using a logit regression (library MASS, Venables &  
281 Ripley, 2002) to determine the time of 50% of emergence of adults. For each population, an ANOVA  
282 analysis (Chi<sup>2</sup> model) was used to test the effect of watering regime on logistic regression  
283 representing the development time.

284

285 Differences in fecundity, leaving rate and sex ratio between mites from drought-stressed and well-  
286 watered plants were evaluated with *t*-tests for each population. Because escape rate (expressed as  
287 number of escaped females per plant / number of females deposited per plant) and sex-ratio  
288 (expressed as number of female per plant/ (number of females per plant + number of males per  
289 plant) are both limited from 0 to 1, they were respectively transformed to  $[\arcsin(\sqrt{1-x})]$  and  
290  $[\arcsin(\sqrt{x})]$  before analysis.

291

292 Our estimate of development time is a population-level estimate, and thus there is only one value  
293 per population and plant watering regime. Similarly, there is only one difference value in fecundity,  
294 leaving rate and sex-ratio per population and watering regimes (the same plant cannot be drought-  
295 stressed and non-stressed).

296

297 ANOVAs were conducted separately to test significance (1) of stress factors; (2) between populations  
298 for each trait and (3) between age of females (3 and 9 days old). When the ANOVA analyses between  
299 watering regimes were significant, correlations were tested for the difference between water  
300 regimes and each of the 20 climatic variables (19 Bioclimatic variables + Global Aridity Index). In the  
301 same way, correlations were tested for non-stressed or drought-stressed traits' plant data when the  
302 ANOVAS analyses between populations were significant.

## 303 Results

### 304 1 Climatic characteristics of the mite sampled locations

305 The sampled locations represent a quite wide range of climatic conditions encountered in Europe  
306 where *T. urticae* has been recorded (Migeon et al. 2019) and where the mite can develop (Litskas et  
307 al. 2019). The Global Aridity Index ranges from 0.2 in Kouklia (CY-II, Cyprus) to 1.13 in Salies-de-Béarn  
308 (FR-V, France), 0.2 being the threshold of the arid classification (Trabuco & Zomer, 2019). Other Cyprus  
309 and Greece locations sampled correspond to semi-arid classification (Global Aridity Index < 0.5), Spain  
310 locality to dry sub-humid (Global Aridity Index < 0.65) and Italy, France and United Kingdom to the  
311 humid classification (Global Aridity Index > 0.65). Among the humid and sub-humid locations sampled,  
312 important differences are to be noted: the French FR-I and FR-V locations display a very humid climate  
313 (Global Aridity Index > 1), and maximal summer temperature > 24 °C, whereas the United Kingdom  
314 and FR-II locations are less humid (Global Aridity Index < 1) and have colder summer (maximal summer  
315 temperature < 21 °C). Spain and Italy localities are characterized by hot summers (> 27 °C) with a drier  
316 tendency for the Spanish locality.

317

318 The analysis of Gaussen climatograms (Figure S5) reveals that Cyprus localities have 7 months of hydric  
319 deficit, Greece locality 6 months, Spain and Italy 1 month. All values are summarized in Figure 1.

320

321 According to the PCA analysis on sampled localities, completed by the HCPC based on the climate  
322 values (Figure 4), the first three axes gather 90% of the total variance and were retained for following  
323 analysis and clustering. The first axis opposed the arid and hot Mediterranean cluster (+) to the  
324 oceanic-continental wet and temperate cluster (-) localities. The second axis opposed the wet winter  
325 Pays Basque cluster (+) to the drier winter Channel and Alsace (-) localities, whereas the third axis  
326 discriminated the continental Alsace cluster (+) of the more oceanic Channel cluster (-) localities.

327

328 The Bioclimatic variables BIO02, BIO03, BIO04, BIO07 (annual and daily temperature ranges), BIO08  
329 (temperature of the wettest quarter) contributed less ( $\cos^2$ ) to the first two axes as a result of the  
330 choice of the sampled localities, maximizing Global Aridity Index extent.

331

332

333

## Climate data PCA analysis

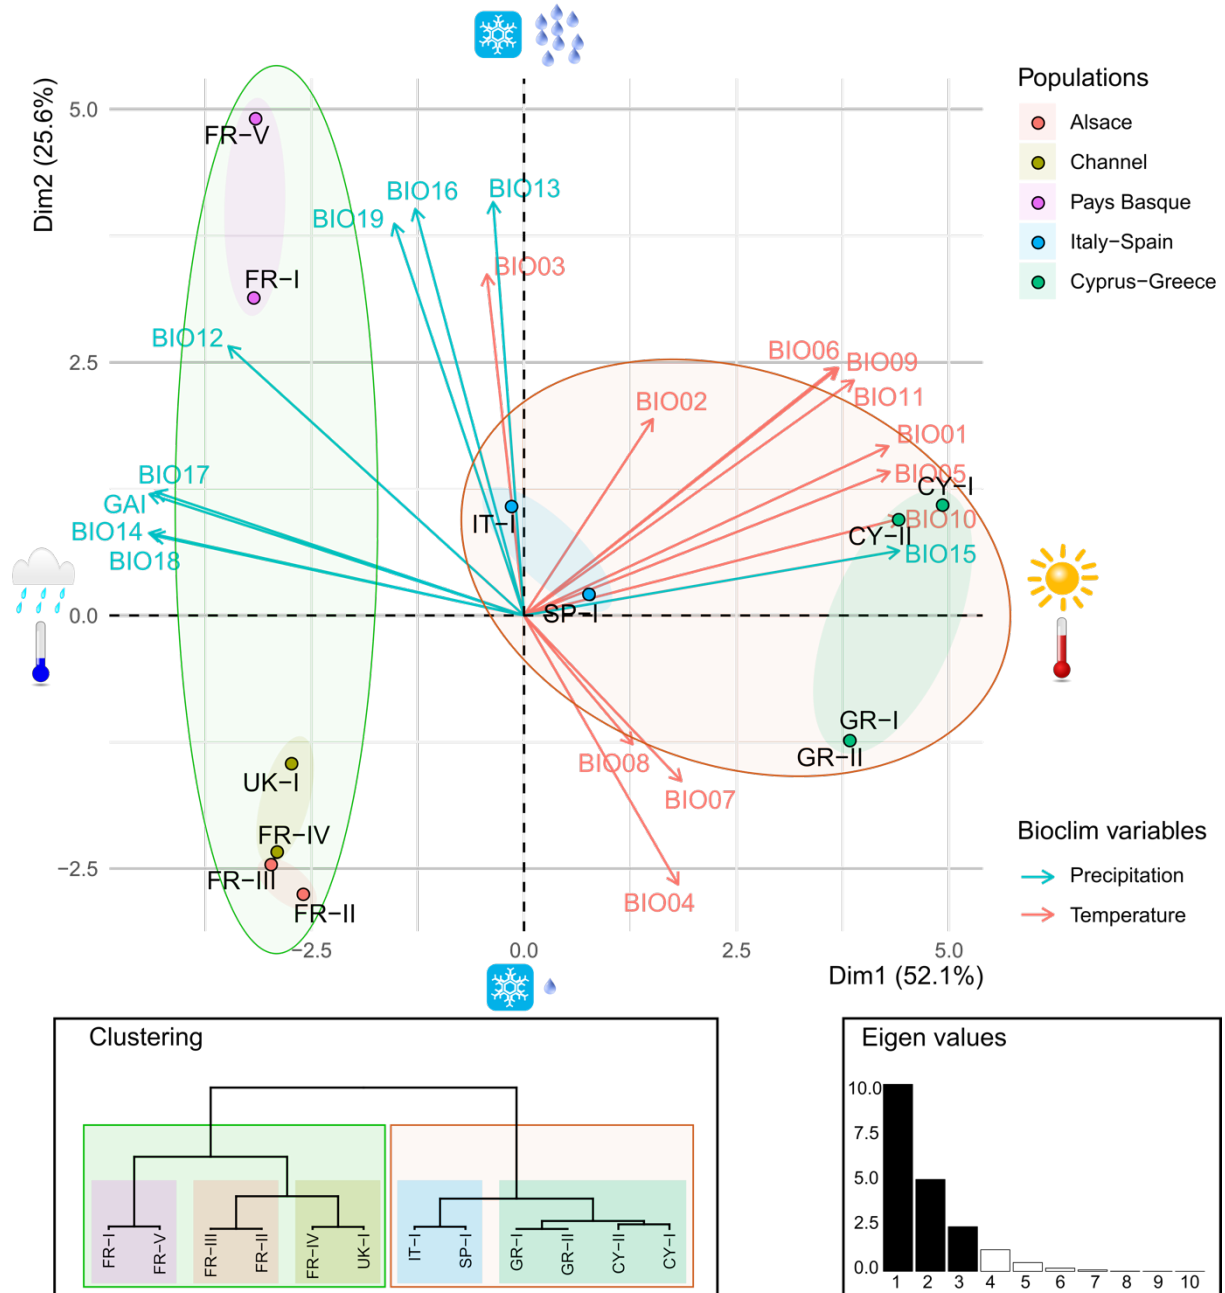

334

335

336 Figure 4. PCA analysis on the 20 climatic variables analysed (19 Bioclim + Global Aridity Index, see  
337 Supplementary Table S1 for complete description). The Eigen values and hierarchical clustering  
338 are reported inside the cartridges.

339

340



## 341 **2 Life History traits analyses**

### 342 **2.1 Development time**

343 Mites from all populations developed faster when reared on drought-stressed plants (Table 2 and  
344 Figure 5). The reduction in development time from the egg to adult ranged from 0.54 day (GR-II) to  
345 1.35 day (FR-II).

346

347

348

Table 2. Development duration for each population of *Tetranychus urticae* on non stressed and drought stressed plants. Logit values of the 50% adult emergence +/- CI (in days).

| Population | Non-stressed (NS) | Stressed (S) | Difference (S-NS) | F value | Df | P-value   | Variation direction |
|------------|-------------------|--------------|-------------------|---------|----|-----------|---------------------|
| CY-I       | 10.15 ± 0.02      | 9.22 ± 0.02  | -0.93             | 3574    | 8  | <0.001*** | ↘                   |
| CY-II      | 9.97 ± 0.03       | 9.16 ± 0.02  | -0.81             | 2050    | 8  | <0.001*** | ↘                   |
| FR-I       | 9.92 ± 0.02       | 8.61 ± 0.02  | -1.31             | 3311    | 8  | <0.001*** | ↘                   |
| FR-II      | 9.84 ± 0.02       | 8.49 ± 0.01  | -1.35             | 3818    | 8  | <0.001*** | ↘                   |
| FR-III     | 9.94 ± 0.02       | 9.08 ± 0.01  | -0.86             | 2648    | 8  | <0.001*** | ↘                   |
| FR-IV      | 9.97 ± 0.02       | 9.31 ± 0.02  | -0.66             | 3803    | 8  | <0.001*** | ↘                   |
| FR-V       | 10.60 ± 0.02      | 9.38 ± 0.02  | -1.23             | 2586    | 8  | <0.001*** | ↘                   |
| GR-I       | 10.00 ± 0.02      | 9.21 ± 0.02  | -0.79             | 3276    | 8  | <0.001*** | ↘                   |
| GR-II      | 9.82 ± 0.02       | 9.28 ± 0.02  | -0.54             | 4947    | 8  | <0.001*** | ↘                   |
| IT-I       | 10.05 ± 0.03      | 9.22 ± 0.02  | -0.84             | 2355    | 8  | <0.001*** | ↘                   |
| SP-I       | 9.77 ± 0.02       | 9.14 ± 0.02  | -0.63             | 4239    | 8  | <0.001*** | ↘                   |
| UK-I       | 9.84 ± 0.02       | 8.97 ± 0.01  | -0.87             | 3847    | 8  | <0.001*** | ↘                   |
| Mean       | 9.99              | 9.09         | -0.90             |         |    |           |                     |

350

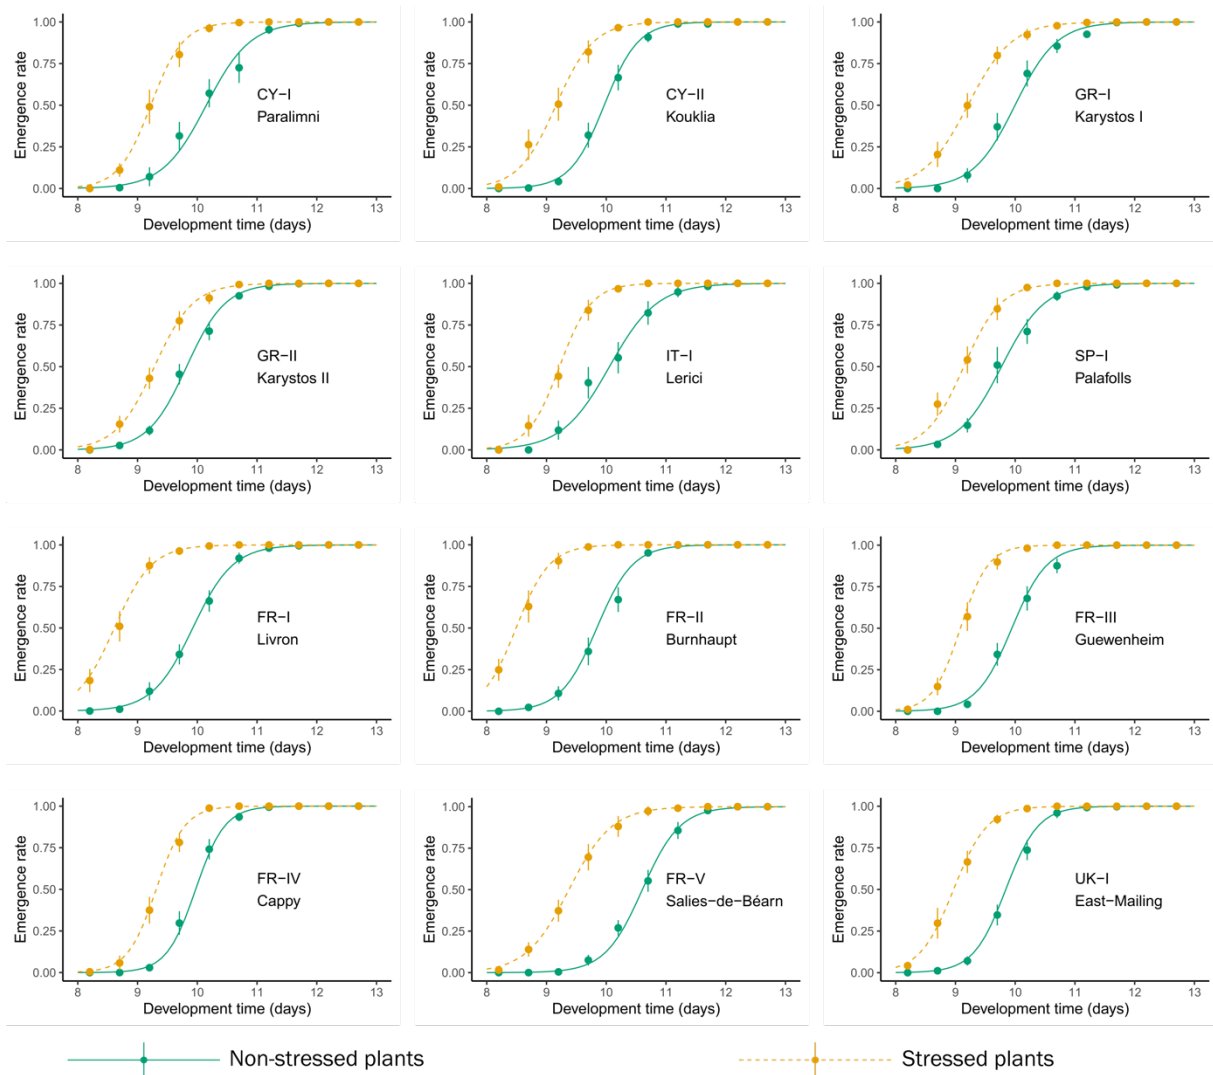

352

353 Figure 5. Development time from egg to adult of the twelve populations of *Tetranychus urticae*  
354 reared on drought-stressed and non-stressed plants. Values correspond to mean emergence rate  
355 of adults and error bar to standard error at each observation point. Curves represent the logit  
356 regression.

357

358

359 ANOVA conducted on development time data showed highly significant variation between the water  
360 regimes ( $P < 0.001$ ) but not between populations (Table 3). Thus we further only tested the  
361 correlations between the differences of development time and the climatic variables of the locations.  
362 We observed a positive correlation between the reduction in development time and Global Aridity  
363 Index (see Table 4). The development time was shorter on drought-stressed plants and the reduction  
364 increased for the mites originated from locations with high summer humidity (high Global Aridity  
365 Index). In addition, a significant correlation was also observed for five others climatic variables (see  
366 Table 4 and Supplementary Table 1). All but one of the climatic variables (BIO19, Winter  
367 Precipitations) refer to summer hydric local conditions that may be responsible for plant water  
368 stress, which is in line with the correlation obtained with the Global Aridity Index. Despite the fact  
369 that BIO19 was also correlated to others rainfall variables, the variable is not relevant for French,  
370 English and to a lesser extent, Spanish and Italian two spotted spider mite populations. While mites  
371 from these origins do experience a winter diapause, they are not subject to variations for theses  
372 climatic parameters during winter.  
373  
374

Table 3. ANOVA on each life history trait.

| Life history trait                                       |               | df | Sum. of sq. | F value | <i>P</i> -value |
|----------------------------------------------------------|---------------|----|-------------|---------|-----------------|
| Development duration                                     | Stress factor | 1  | 4.86        | 140.389 | < 0.001 ***     |
|                                                          | Population    | 11 | 0.98        | 2.574   | 0.066           |
|                                                          | Residuals     | 11 | 0.38        |         |                 |
| Fecundity of 3-day-old females                           | Stress factor | 1  | 5.72        | 9.058   | 0.012 *         |
|                                                          | Population    | 11 | 34.75       | 5.000   | 0.006 **        |
|                                                          | Residuals     | 11 | 6.95        |         |                 |
| Fecundity of 9-day-old females                           | Stress factor | 1  | 0.60        | 1.586   | 0.234           |
|                                                          | Population    | 11 | 55.38       | 13.416  | < 0.001 ***     |
|                                                          | Residuals     | 11 | 4.13        |         |                 |
| Fecundity on non-stressed Plants                         | Age           | 1  | 41.87       | 52.074  | < 0.001 ***     |
|                                                          | Population    | 11 | 37.46       | 4.235   | 0.012 *         |
|                                                          | Residuals     | 11 | 8.84        |         |                 |
| Fecundity on drought stressed plants                     | Age           | 1  | 65.47       | 53.479  | < 0.001 ***     |
|                                                          | Population    | 11 | 41.44       | 3.077   | 0.038 *         |
|                                                          | Residuals     | 11 | 13.47       |         |                 |
| Progeny sex ratio of 3-day-old-females                   | Stress factor | 1  | 0.001       | 1.805   | 0.206           |
|                                                          | Population    | 11 | 0.093       | 10.450  | < 0.001 ***     |
|                                                          | Residuals     | 11 | 0.009       |         |                 |
| Progeny sex ratio of 9-day-old-females                   | Stress factor | 1  | 0.007       | 1.995   | 0.186           |
|                                                          | Population    | 11 | 0.152       | 3.818   | 0.018 *         |
|                                                          | Residuals     | 11 | 0.040       |         |                 |
| Progeny sex-ratio on non-stressed plants                 | Age           | 1  | 0.226       | 65.152  | < 0.001 ***     |
|                                                          | Population    | 11 | 0.099       | 2.599   | 0.064           |
|                                                          | Residuals     | 11 | 0.038       |         |                 |
| Progeny sex-ratio on drought stressed plants             | Age           | 1  | 0.273       | 69.85   | < 0.001 ***     |
|                                                          | Population    | 11 | 0.114       | 2.65    | 0.061           |
|                                                          | Residuals     | 11 | 0.043       |         |                 |
| Leaving rate of 3-day-old females                        | Stress factor | 1  | 0.034       | 6.351   | 0.029 *         |
|                                                          | Population    | 11 | 0.119       | 1.995   | 0.134           |
|                                                          | Residuals     | 11 | 0.060       |         |                 |
| Leaving rate of 9-day-old females                        | Stress factor | 1  | 0.092       | 10.975  | 0.007 **        |
|                                                          | Population    | 11 | 0.317       | 3.464   | 0.025 *         |
|                                                          | Residuals     | 11 | 0.092       |         |                 |
| Leaving rate of 9-day-old females on non-stressed plants | Age           | 1  | 0.076       | 6.769   | 0.025 *         |
|                                                          | Population    | 11 | 0.264       | 2.138   | 0.112           |
|                                                          | Residuals     | 11 | 0.123       |         |                 |

|                                                              |            |    |       |       |       |
|--------------------------------------------------------------|------------|----|-------|-------|-------|
| Leaving rate of 9-day-old females on drought-stressed plants | Age        | 1  | 0.025 | 3.336 | 0.095 |
|                                                              | Population | 11 | 0.117 | 1.406 | 0.291 |
|                                                              | Residuals  | 11 | 0.083 |       |       |

375

376

377

Table 4. Correlations between difference in development time between the two water regimes and climatic variables. Only significant values are reported.

| Climatic variable                  | R <sup>2</sup> | P-value |
|------------------------------------|----------------|---------|
| GAI Global Aridity Index           | 0.386          | 0.031   |
| BIO12 Annual Precipitations        | 0.427          | 0.021   |
| BIO14 Precipitations Driest Month  | 0.391          | 0.03    |
| BIO17 Precipitations Driest season | 0.356          | 0.041   |
| BIO18 Summer Precipitations        | 0.338          | 0.048   |
| BIO19 Winter Precipitations        | 0.363          | 0.038   |

378

379

380 **2.2 Fecundity**

381 Life history traits variation in mite populations in response to host plant water regimes is summarised  
382 in Figure 6.

383

384

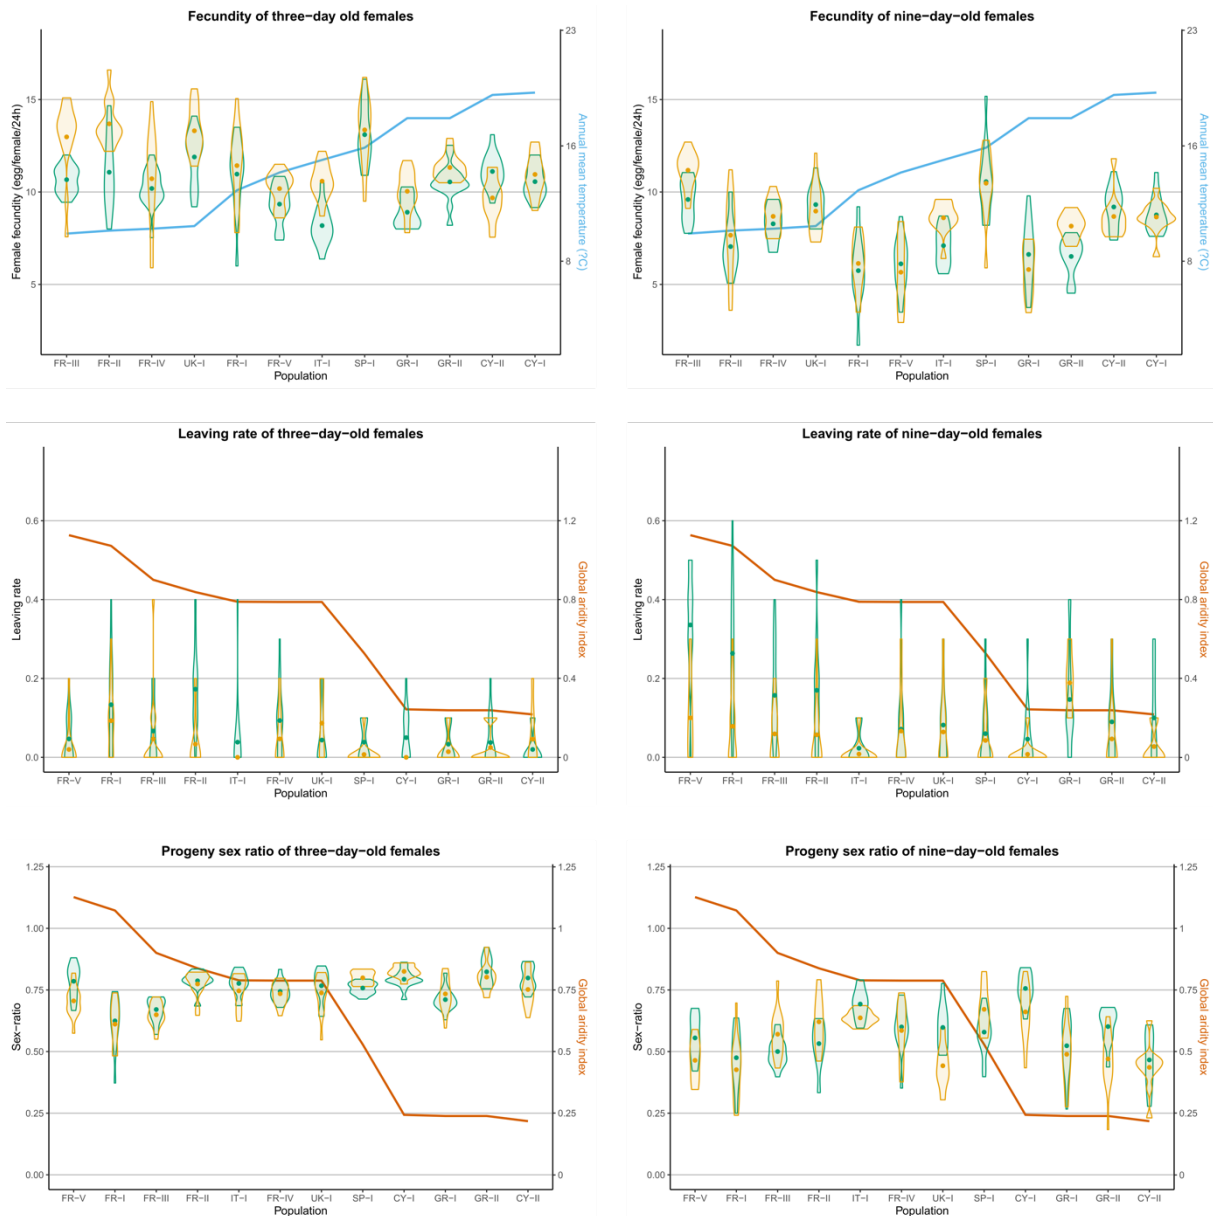

385

Hydric stress level: ● stressed plants, ■ non-stressed plants

386

387 Figure 6. Life history trait variation among the 12 populations of *Tetranychus urticae* studied, in  
388 response to plant water stress regime. For each of the traits, populations are ordered by the climatic  
389 variable selected as a synthesis of the link between the trait and the climate: Annual Mean  
390 Temperature (blue line) for fecundity and Global Aridity Index (brown line) for progeny sex-ratio and  
391 leaving rate.

392

393



394 **2.2.1 Three-day-old females**

395 For all but one population (CY-II), we observed an increase in the fecundity of females reared on  
396 drought-stressed plants (Table 5) and it was significant for seven populations: FR-I, FR-III, FR-V, GR-I,  
397 GR-II, IT-I and UK-I. The two ANOVA analyses performed with differences in fecundities observed  
398 between water regimes and between mite populations, were significant (Table 3). Three sets of  
399 correlations were subsequently tested with the climatic variables on sampling locations and the  
400 differences of fecundity of three-day-old females, the values of fecundity three-day-old females  
401 reared on drought-stressed plants and the values of fecundity three-day-old females reared on non-  
402 stressed plants. Significant correlations were observed for fecundity differences of three-day-old  
403 females between water regimes and for fecundity of three-day-old females reared on drought-  
404 stressed plants. By contrast, none of the correlations were significant for fecundity of three-day-old  
405 females reared on non-stressed plants. Three climatic variables (BIO01, BIO06 and BIO11) showing  
406 significant correlations are the same for both (differences between water regimes and drought  
407 stressed plants) and are related to temperature, especially winter temperatures (see Table 6) with an  
408 increase in fecundity and with the difference of fecundity between the two water regimes for the  
409 locations with colder temperatures (Figure 6).

410

411 In summary, the fecundity of three-day-old females increased (Table 5) for 8 out of the 12 mite  
412 populations studied, showing significant greater values on drought-stressed plants. The increase was  
413 higher for mites from locations with cold winter and low annual mean temperatures (Figure 6).

414

415

Table 5. Fecundity of the females for each population of *Tetranychus urticae* on non-stressed and drought-stressed plants.

| Fecundity of 3-day-old female fecundity (egg/female/day) |                   |              |                   |         |    |           |                     |
|----------------------------------------------------------|-------------------|--------------|-------------------|---------|----|-----------|---------------------|
| Population                                               | Non-stressed (NS) | Stressed (S) | Difference (S-NS) | F value | Df | P-value   | Variation direction |
| CY-I                                                     | 10.56 ± 0.25      | 10.95 ± 0.32 | 0.39              | -1.004  | 24 | 0.325     | ↗                   |
| CY-II                                                    | 11.11 ± 0.26      | 9.68 ± 0.32  | -1.43             | 3.859   | 28 | <0.001*** | ↘                   |
| FR-I                                                     | 10.97 ± 0.56      | 11.43 ± 0.61 | 0.46              | -0.616  | 27 | 0.543     | ↗                   |
| FR-II                                                    | 11.07 ± 0.59      | 13.69 ± 0.34 | 2.62              | -4.155  | 24 | <0.001*** | ↗                   |
| FR-III                                                   | 10.67 ± 0.21      | 12.98 ± 0.58 | 2.31              | -4.204  | 28 | <0.001*** | ↗                   |
| FR-IV                                                    | 10.19 ± 0.3       | 10.72 ± 0.73 | 0.53              | -0.744  | 28 | 0.463     | ↗                   |
| FR-V                                                     | 9.34 ± 0.31       | 10.18 ± 0.26 | 0.84              | -2.346  | 28 | 0.026 *   | ↗                   |
| GR-I                                                     | 8.90 ± 0.24       | 10.04 ± 0.32 | 1.13              | -3.171  | 27 | 0.004 **  | ↗                   |
| GR-II                                                    | 10.55 ± 0.29      | 11.33 ± 0.19 | 0.78              | -2.592  | 30 | 0.015 *   | ↗                   |
| IT-I                                                     | 8.18 ± 0.3        | 10.58 ± 0.27 | 2.40              | -6.142  | 24 | <0.001*** | ↗                   |
| SP-I                                                     | 13.10 ± 0.46      | 13.36 ± 0.52 | 0.26              | -0.388  | 25 | 0.701     | ↗                   |
| UK-I                                                     | 11.89 ± 0.42      | 13.31 ± 0.36 | 1.42              | -2.907  | 29 | 0.007 **  | ↗                   |
| Mean                                                     | 10.54             | 11.52        | 0.98              |         |    |           |                     |

| Fecundity of 9-day-old female fecundity (egg/female/day) |                   |              |                   |         |    |           |                     |
|----------------------------------------------------------|-------------------|--------------|-------------------|---------|----|-----------|---------------------|
| Population                                               | Non-stressed (NS) | Stressed (S) | Difference (S-NS) | F value | Df | P-value   | Variation direction |
| CY-I                                                     | 8.76 ± 0.27       | 8.65 ± 0.24  | -0.11             | 0.305   | 24 | 0.763     | ↘                   |
| CY-II                                                    | 9.19 ± 0.29       | 8.67 ± 0.35  | -0.52             | 1.147   | 24 | 0.262     | ↘                   |
| FR-I                                                     | 5.74 ± 0.58       | 6.13 ± 0.38  | 0.39              | -0.584  | 23 | 0.565     | ↗                   |
| FR-II                                                    | 7.05 ± 0.45       | 7.66 ± 0.61  | 0.61              | -0.75   | 22 | 0.461     | ↗                   |
| FR-III                                                   | 9.59 ± 0.29       | 11.18 ± 0.25 | 1.58              | -4.107  | 27 | <0.001*** | ↗                   |
| FR-IV                                                    | 8.28 ± 0.26       | 8.68 ± 0.32  | 0.40              | -0.982  | 21 | 0.337     | ↗                   |
| FR-V                                                     | 6.11 ± 0.37       | 5.66 ± 0.78  | -0.45             | 0.599   | 19 | 0.556     | ↘                   |
| GR-I                                                     | 6.62 ± 0.44       | 5.80 ± 0.47  | -0.82             | 1.212   | 22 | 0.238     | ↘                   |
| GR-II                                                    | 6.51 ± 0.34       | 8.15 ± 0.17  | 1.64              | -4.842  | 23 | <0.001*** | ↗                   |
| IT-I                                                     | 7.10 ± 0.28       | 8.60 ± 0.25  | 1.51              | -3.974  | 23 | <0.001*** | ↗                   |
| SP-I                                                     | 10.56 ± 0.48      | 10.47 ± 0.47 | -0.09             | 0.127   | 27 | 0.900     | ↘                   |
| UK-I                                                     | 9.32 ± 0.30       | 8.96 ± 0.37  | -0.35             | 0.712   | 23 | 0.484     | ↘                   |
| Mean                                                     | 7.90              | 8.22         | 0.32              |         |    |           |                     |

416

Table 6. Correlations between the fecundity of 3-day-old female: (1) difference between water regimes and (2) drought-stressed plants, and climatic variables. Only significant values are reported.

| Climatic variable                | Difference between water regimes |         | Drought-stressed plants |         |
|----------------------------------|----------------------------------|---------|-------------------------|---------|
|                                  | R <sup>2</sup>                   | P-value | R <sup>2</sup>          | P-value |
| BIO01 Annual Mean Temp.          | 0.361                            | 0.039   | 0.355                   | 0.041   |
| BIO03 Isothermality              | 0.427                            | 0.021   | -                       | -       |
| BIO06 Min Temp. Coldest Month    | 0.484                            | 0.012   | 0.416                   | 0.024   |
| BIO09 Mean Temp. Driest Quarter  | -                                | -       | 0.373                   | 0.035   |
| BIO11 Mean Temp. Coldest Quarter | 0.49                             | 0.011   | 0.391                   | 0.03    |

417

418

### 419 **2.2.2 Nine-day-old females**

420 We observed a significant increase (Table 5) of fecundity of females reared on drought-stressed  
421 plants for three populations (FR-III, GR-II and IT-I). Only the ANOVA analysis performed between  
422 populations show significant differences. Two sets of correlations were subsequently tested between  
423 the climatic variables on sampling locations and the fecundity of nine-day-old females reared on non-  
424 stressed plants and on drought-stressed plants. Only the BIO19 (Winter Precipitations) variable was  
425 significant with non-stressed plants.

426

### 427 **2.2.3 Comparison between three- and nine-day-old fecundity**

428 ANOVA analysis performed between fecundity of the two different age females (three-day-old and  
429 nine-day-old) were significant (Table 3). The nine-day-old females laid fewer eggs than the three-day-  
430 old females, for both non-stressed and drought-stressed plants. We also observed a correlation  
431 between females reared on well-watered plants (three-day-old and nine-day-old,  $r^2=0.395$ ,  $p=0.029$ ).

## 432 **2.3 Leaving rate**

### 433 **2.3.1 Three-day-old females**

434 Although ten of the twelve populations studied showed a decrease in the leaving rate of females on  
435 drought-stressed plants (Table 7), results were significant for only two of them (CY-I and FR-II). The  
436 ANOVA analysis on differences in leaving rate of three-day-old females calculated between plant  
437 water regimes was also significant (Table 3) and the average mite leaving rate was found to be  
438 approximately twice lower on drought-stressed plants than on non-stressed ones. Subsequently, one  
439 set of correlations was tested between the differences of leaving rate of three-day-old females and  
440 the climatic variables. Only the correlation with the climatic variable BIO07 (Annual Temperature  
441 Range) was significant.

442

### 443 **2.3.2 Nine-day-old females**

444 The leaving rate of nine-day-old females was generally higher for mites exposed to non-stressed  
445 plants. From the twelve populations studied, eleven showed an increase in the leaving rate on non-  
446 stressed plants (Table 7), and four of them (FR-I, FR-II, FR-III, FR-V) were significant. The two ANOVA  
447 analyses performed, one on differences calculated between plant water regimes and a second  
448 between populations were significant (Table 3). On average, the leaving rate was twice lower on  
449 drought-stressed plants than on non-stressed ones. Subsequently, three sets of correlations were

450 tested with the climatic variables and the differences calculated between plant water regimes of the  
451 leaving rate of nine-day-old females, the values of the leaving rate of nine-day-old females reared on  
452 non-stressed plants and the values of the leaving rate of nine-day-old females reared on drought-  
453 stressed plants. Significant correlations (Table 8) with climatic variables were observed for  
454 differences between plant water regimes and for drought-stressed plants, while none of the tests  
455 involving non-stressed plants were significant. Each of climatic variables BIO12, BIO14, BIO17, BIO18  
456 and BIO19 were correlated with the differences between water regimes and also with the leaving  
457 rate on non-stressed plants. These represent precipitations variables and all but one (BIO19) denote  
458 to summer precipitation or dryness. Global Aridity Index and BIO16 were also correlated with the  
459 differences calculated between water regimes.

460

461 As observed for the development time pattern, mites originating from the four most humid localities  
462 (FR-I, FR-II, FR-III, and FR-V) showed higher differences between the two water regimes and in line  
463 with this, the climatic variables related to precipitation and dryness were linked to the correlations  
464 with differences in the two water regimes.

465

### 466 *2.3.3 Comparison between three and nine-day-old females*

467 ANOVA analysis between female mites from the two age groups showed significant differences for  
468 mites reared on non-stressed plants only (Table 3). The leaving rate of nine-day-old females was  
469 twice that of the three-day-old females.

470

471

Table 7. Leaving rate of females for each population of *Tetranychus urticae* on non-stressed and drought stressed plants.

Leaving rate of 3-day-old females (number of females attempted to leave/number total of females)

| Population | Non-stressed (NS) | Stressed (S)  | Difference (S-NS) | t on arcsin(sqrt(y)) | Df | P-value   | Variation direction |
|------------|-------------------|---------------|-------------------|----------------------|----|-----------|---------------------|
| CY-I       | 0.05 ± 0.017      | 0 ± 0         | -0.050            | -2.825               | 24 | 0.009 **  | ↘                   |
| CY-II      | 0.02 ± 0.011      | 0.046 ± 0.019 | 0.026             | 1.021                | 28 | 0.316     | ↗                   |
| FR-I       | 0.133 ± 0.032     | 0.093 ± 0.025 | -0.040            | -0.693               | 27 | 0.494     | ↘                   |
| FR-II      | 0.173 ± 0.033     | 0.033 ± 0.019 | -0.139            | -4.541               | 24 | <0.001*** | ↘                   |
| FR-III     | 0.067 ± 0.021     | 0.047 ± 0.027 | -0.020            | -0.915               | 28 | 0.368     | ↘                   |
| FR-IV      | 0.093 ± 0.023     | 0.047 ± 0.019 | -0.047            | -1.76                | 28 | 0.089     | ↘                   |
| FR-V       | 0.047 ± 0.017     | 0.02 ± 0.014  | -0.027            | -1.462               | 28 | 0.155     | ↘                   |
| GR-I       | 0.033 ± 0.013     | 0.014 ± 0.010 | -0.019            | -1.185               | 27 | 0.246     | ↘                   |
| GR-II      | 0.037 ± 0.015     | 0.025 ± 0.011 | -0.012            | -0.519               | 30 | 0.608     | ↘                   |
| IT-I       | 0.038 ± 0.031     | 0 ± 0         | -0.038            | -1.375               | 24 | 0.182     | ↘                   |
| SP-I       | 0.038 ± 0.014     | 0.007 ± 0.007 | -0.031            | -2.031               | 25 | 0.053     | ↘                   |
| UK-I       | 0.044 ± 0.018     | 0.087 ± 0.024 | 0.043             | 1.386                | 29 | 0.176     | ↗                   |
| Mean       | 0.064             | 0.035         | -0.030            |                      |    |           |                     |

Leaving rate of 9-day-old females (escaped females/number total of females)

| Population | Non-stressed (NS) | Stressed (S)  | Difference (S-NS) | t on arcsin(sqrt(y)) | Df | P-value  | Variation direction |
|------------|-------------------|---------------|-------------------|----------------------|----|----------|---------------------|
| CY-I       | 0.046 ± 0.024     | 0.008 ± 0.008 | -0.038            | -1.572               | 24 | 0.129    | ↘                   |
| CY-II      | 0.1 ± 0.032       | 0.027 ± 0.014 | -0.073            | -1.536               | 24 | 0.138    | ↘                   |
| FR-I       | 0.264 ± 0.053     | 0.079 ± 0.026 | -0.185            | -3.322               | 23 | 0.003 ** | ↘                   |
| FR-II      | 0.17 ± 0.047      | 0.057 ± 0.025 | -0.113            | -2.473               | 22 | 0.021 *  | ↘                   |
| FR-III     | 0.157 ± 0.033     | 0.059 ± 0.019 | -0.098            | -2.724               | 27 | 0.011 *  | ↘                   |
| FR-IV      | 0.071 ± 0.03      | 0.067 ± 0.037 | -0.005            | -0.226               | 21 | 0.823    | ↘                   |
| FR-V       | 0.336 ± 0.037     | 0.1 ± 0.044   | -0.236            | -3.558               | 19 | 0.002 ** | ↘                   |
| GR-I       | 0.147 ± 0.034     | 0.189 ± 0.026 | 0.042             | 1.281                | 22 | 0.214    | ↗                   |
| GR-II      | 0.09 ± 0.031      | 0.047 ± 0.022 | -0.043            | -1.316               | 23 | 0.201    | ↘                   |
| IT-I       | 0.023 ± 0.012     | 0.008 ± 0.008 | -0.015            | -0.984               | 23 | 0.336    | ↘                   |
| SP-I       | 0.06 ± 0.024      | 0.043 ± 0.02  | -0.017            | -0.585               | 27 | 0.563    | ↘                   |
| UK-I       | 0.082 ± 0.03      | 0.064 ± 0.025 | -0.018            | -0.528               | 23 | 0.603    | ↘                   |
| Mean       | 0.129             | 0.062         | -0.067            |                      |    |          |                     |

472

Table 8. Correlations between leaving rate of 9-day-old females: (1) differences between water regimes and (2) non-stressed plants, and climatic variables. Only significant values are reported.

| Climatic variable                      | Difference between water regimes |         | Non-stressed plants |         |
|----------------------------------------|----------------------------------|---------|---------------------|---------|
|                                        | R <sup>2</sup>                   | P-value | R <sup>2</sup>      | P-value |
| BIO12 Annual Precipitation             | 0.492                            | 0.011   | 0.346               | 0.044   |
| BIO14 Precipitation of Driest Month    | 0.44                             | 0.019   | 0.429               | 0.021   |
| BIO16 Precipitation of Wettest Quarter | 0.395                            | 0.029   | -                   | -       |
| BIO17 Precipitation of Driest Quarter  | 0.414                            | 0.024   | 0.351               | 0.042   |
| BIO18 Precipitation of Warmest Quarter | 0.404                            | 0.026   | 0.341               | 0.046   |
| BIO19 Precipitation of Coldest Quarter | 0.438                            | 0.019   | 0.336               | 0.048   |
| GAI Global Aridity Index               | 0.403                            | 0.027   | -                   | -       |

473

## 474 **2.4 Progeny sex-ratio**

### 475 **2.4.1 Three-day-old females**

476 Sex-ratio progeny showed significant differences between water regimes in four populations (Table  
477 9). However, two of them corresponded to an increase (CY-II and FR-V) and two others (CY-I and SP-I)  
478 to a decrease of male proportion. ANOVA analysis between populations showed significant  
479 differences in this life trait (Table 3) but ANOVA analysis between drought regimes was not  
480 significant. Two sets of correlations were then tested between the climatic variables and the sex-  
481 ratio values of the progeny of three-day-old females reared on non-stressed plants and on drought-  
482 stressed plants. A significant correlation between the climatic variables and the sex ratio values was  
483 only found for the progeny of females reared on stressed-plants. These variables were Global Aridity  
484 Index and BIO12, BIO14, BIO17, BIO18. All of them denote precipitation regimes, in particular  
485 summer precipitation and dryness. As a result, the females originating from drier locations and  
486 reared on drought-stressed plants produced more females than the females originating from wet  
487 locations.

488

### 489 **2.4.2 Nine-day-old females**

490 A significant increase (Table 9) of male proportion was observed in five populations (CY-I, FR-V, GR-II,  
491 IT-I, UK-I) but a decrease in three others (FR-II, FR-III, SP-I). As for three-day-old females only the  
492 ANOVA analysis performed between populations showed significant differences in the value of  
493 progeny sex ratio. Subsequently, two correlations were tested between climatic variables and the  
494 sex-ratio values of nine-day-old female progeny reared on non-stressed plants and on drought-  
495 stressed plants. None of the tested correlations were significant.

496

### 497 **2.4.3 Comparison between three and nine-day-old females**

498 ANOVA comparing progeny sex ratio between the two different age females (three-day-old and nine-  
499 day-old) age showed significant differences for both, non-stressed and drought-stressed plants  
500 regimes (Table 3). For the two water regimes the sex-ratio of nine-day-old female progeny was  
501 lower, i.e. more males were produced by old females than by young females.

502

503

Table 9. Progeny sex-ratio for each population of *Tetranychus urticae* on non-stressed and drought stressed plants.

Progeny sex-ratio of 3-day-old females (number of females/(number of males +females))

| Population | Non-stressed (NS) | Stressed (S)  | Diffrence (S-NS) | t on arcsin(sqrt(y)) | Df | P-value   | Variation direction |
|------------|-------------------|---------------|------------------|----------------------|----|-----------|---------------------|
| CY-I       | 0.794 ± 0.010     | 0.825 ± 0.007 | 0.032            | -2.523               | 24 | 0.019 *   | ↗                   |
| CY-II      | 0.799 ± 0.012     | 0.752 ± 0.017 | -0.047           | 2.139                | 28 | 0.041 *   | ↘                   |
| FR-I       | 0.624 ± 0.025     | 0.611 ± 0.025 | -0.013           | 0.368                | 27 | 0.716     | ↘                   |
| FR-II      | 0.787 ± 0.012     | 0.774 ± 0.013 | -0.013           | 0.686                | 24 | 0.499     | ↘                   |
| FR-III     | 0.671 ± 0.012     | 0.649 ± 0.012 | -0.021           | 1.26                 | 28 | 0.218     | ↘                   |
| FR-IV      | 0.744 ± 0.010     | 0.735 ± 0.011 | -0.009           | 0.616                | 28 | 0.543     | ↘                   |
| FR-V       | 0.785 ± 0.017     | 0.706 ± 0.016 | -0.080           | 3.504                | 28 | 0.002 **  | ↘                   |
| GR-I       | 0.711 ± 0.011     | 0.734 ± 0.018 | 0.023            | -1.156               | 27 | 0.257     | ↗                   |
| GR-II      | 0.824 ± 0.014     | 0.802 ± 0.014 | -0.022           | 1.081                | 30 | 0.289     | ↘                   |
| IT-I       | 0.777 ± 0.013     | 0.746 ± 0.018 | -0.030           | 1.362                | 24 | 0.186     | ↘                   |
| SP-I       | 0.758 ± 0.007     | 0.799 ± 0.007 | 0.041            | -4.301               | 25 | <0.001*** | ↗                   |
| UK-I       | 0.767 ± 0.016     | 0.738 ± 0.019 | -0.029           | 1.185                | 29 | 0.246     | ↘                   |
| Mean       | 0.753             | 0.739         | -0.014           |                      |    |           |                     |

Progeny sex-ratio of 9-day-old females (number of females/(number of males +females))

| Population | Non-stressed (NS) | Stressed (S)  | Diffrence (S-NS) | t on arcsin(sqrt(y)) | Df | P-value   | Variation direction |
|------------|-------------------|---------------|------------------|----------------------|----|-----------|---------------------|
| CY-I       | 0.756 ± 0.017     | 0.661 ± 0.030 | -0.095           | 2.759                | 24 | 0.011 *   | ↘                   |
| CY-II      | 0.466 ± 0.028     | 0.436 ± 0.029 | -0.030           | 0.729                | 24 | 0.473     | ↘                   |
| FR-I       | 0.475 ± 0.029     | 0.426 ± 0.032 | -0.049           | 1.023                | 23 | 0.317     | ↘                   |
| FR-II      | 0.532 ± 0.028     | 0.621 ± 0.028 | 0.088            | -2.179               | 22 | 0.040 *   | ↗                   |
| FR-III     | 0.500 ± 0.015     | 0.570 ± 0.023 | 0.070            | -2.481               | 27 | 0.012 *   | ↗                   |
| FR-IV      | 0.600 ± 0.025     | 0.586 ± 0.040 | -0.014           | 0.305                | 21 | 0.763     | ↘                   |
| FR-V       | 0.555 ± 0.023     | 0.464 ± 0.033 | -0.091           | 2.283                | 19 | 0.034 *   | ↘                   |
| GR-I       | 0.524 ± 0.029     | 0.489 ± 0.043 | -0.035           | 0.677                | 22 | 0.506     | ↘                   |
| GR-II      | 0.601 ± 0.024     | 0.470 ± 0.030 | -0.131           | 3.134                | 23 | 0.005 **  | ↘                   |
| IT-I       | 0.693 ± 0.017     | 0.637 ± 0.008 | -0.056           | 2.871                | 23 | 0.009 **  | ↘                   |
| SP-I       | 0.579 ± 0.022     | 0.671 ± 0.024 | 0.092            | -2.823               | 27 | 0.009 **  | ↗                   |
| UK-I       | 0.598 ± 0.027     | 0.442 ± 0.023 | -0.155           | 4.333                | 23 | <0.001*** | ↘                   |
| Mean       | 0.573             | 0.539         | -0.034           |                      |    |           |                     |

504  
505  
506

## 507 Discussion

508

509 How much the climate in the geographical area of origin of organisms conditions their response to  
510 drought stress is a central question in the context of climate change. This is the focus of the present  
511 study which explores responses of a phytophagous mite, the two spotted spider mite, challenged to  
512 feed on drought-stressed plants. In this study, we reveal that three main factors linked to the  
513 increase of mite populations reared on drought-stressed plants act together in relation to the  
514 climatic variables of the location of origin of mite populations: (1) a shortening of development time,  
515 (2) an increase of fecundity and (3) a decrease of females' emigration, resulting in longer staying on  
516 the plant leaves.

517

518 The shortening of development time for all the studied populations is in line with Nikolova et al.  
519 (2014) who characterised the population increase of a closely related mite species, *Tetranychus*  
520 *turkestani*, as a result of development time shortening on drought-stressed plants. To be notice is  
521 that mites collected from different origins did not respond significantly different for the development  
522 time parameter when reared on well-watered plants, suggesting that mite development time is an  
523 intrinsic parameter of the species which mainly depends on the host-plants species and the  
524 temperature. Temperature is a well-known factor governing development time of ectotherms (Logan  
525 et al., 1976). While Van Petegem et al. (2016) founded a relationship between development time and  
526 latitude (which in their study corresponds to a thermal gradient), variation in development time was  
527 mainly resulting of a development shortening in the northern edge of the mite's distribution. The  
528 absence of relationship of development time observed on well-watered plants and any of the  
529 climatic variables in our study is in accordance with their results as attention was done to collect our  
530 two spotted spider mite populations from localities with contrasting climatic profiles in a quite wide  
531 range of core climate conditions distribution (Litskas et al., 2019) in which the mite can be observed  
532 across its native distribution area (Navajas et al., 1998).

533

534 The increase of fecundity of mites reared on drought-stressed plants has already been reported by  
535 Chandler et al. (1979), Youngman & Barnes (1986), and Youngman et al. (1988). Physiological  
536 changes that occur in drought-stressed plants may also induce shifts in plant-feeding mites. For  
537 example, development time may decrease and fecundity can increase, as found by Ximénez-Embun  
538 et al. (2017a) and Santamaria et al. (2018) for *T. urticae* and also for another plant mite, *A. lycopersici*  
539 (Ximénez-Embun et al. 2017b). These shifts in mite life history are likely linked to increased  
540 concentration of essential amino acids and free sugars in tomato plants as it was observed by the



541 same authors, which improved the nutritional value of drought-stressed tomato plants. The increase  
542 of fecundity observed here is more modest than seen in Ximenez-Embun et al. (2017a). Differences  
543 between the two studies might be due to differences in methods used. For example, we measured  
544 fecundity as the number of eggs laid over a 24 h period, while Ximenez-Embun et al. (2017a)  
545 measured fecundity as “eggs laid and mobile forms” over a longer period which resulted in a  
546 combination of increased fecundity and decreased mite emigration when females were placed on  
547 drought-stressed whole plants.

548

549 On drought-stressed plants, the decrease of development time and the increase of fecundity of  
550 young females are concomitant. Nevertheless, the higher fecundity of young female is not  
551 counterbalanced by the lower fecundity of nine-day-old females. These results are not in accordance  
552 with Youngman et al. (1988) with *T. pacificus* on almond trees. They observed a shift in peak  
553 fecundity, the increase of the first ten days on drought-stressed plant was counterbalanced by a  
554 decrease after ten days. Nevertheless, our experimental design did not allow us to observe such a  
555 shift with females older than 9-day-old females. When mites were placed on well-watered tomatoes  
556 plants, Alzate et al. (2017) described a quadratic relationship between fecundity and longevity,  
557 suggesting an optimal balance between these two traits. Our experiments highlight this relationship  
558 between fecundity of young and older females and reinforce Alzate et al. (2017) hypothesis of  
559 optimal balance. Thus, fecundity appears as an intrinsic population trait according to the correlations  
560 observed between three-day-old and nine-day-old females reared on well-watered plants. These  
561 results are also in line with Van Petegem et al. (2016) who reported variation in lifetime fecundity of  
562 mites for populations originated from the mite’s core distribution varying in a scale from 20 to 110  
563 eggs per female and not linked to latitude or temperature. Fecundity, dispersal and sex-ratio are  
564 often linked by complex relationships (Van Petegem et al. 2016) and the quality of the environment  
565 which in turn can shape the nutritional quality and the appetite of the host plants, also impacts  
566 these relationships. The hypothesis tends to be supported in the literature: for example, Wrensch  
567 and Young (1983) observed an increase in the proportion of females on plants of poor nutritional  
568 value that was linked to a decrease of fecundity and Yano and Takafuji (2002), using an artificial  
569 selection experiment of low and high dispersal strains, observed an increase of diapause incidence  
570 and a decrease of general performance, especially in non-appetent plants for highly dispersal strains.

571

572 Our study reveals changes in life-history traits of mites when exposed to feed on drought-stressed  
573 plants, with a shortened development time and an increased fecundity along with a decrease of mite  
574 dispersal. Importantly, not all mites tested responded equally but changes varied depending on the  
575 climate conditions experienced in their area of origin. Mite responses while complex, can be, at least

576 partially, explained by the climatic conditions in the sampled locations. Since all the females coming  
577 from the different localities were reared under identical conditions in a common garden experiment,  
578 it is reasonable to accept that observed variation resulted from genetic differentiation in the tested  
579 populations. Mites originating from wet to cool localities (Alsace and Pays Basque) had seldom  
580 experience of drought-stressed host plants while mites from Cyprus and Greece had to face harsh  
581 climate and dryness half of the year. Previous studies (Chen et al., 2020) highlighted that genetic  
582 variation for two closely related species *Tetranychus truncatus* and *Tetranychus pueraricola*, were  
583 associated with climatic parameters, mainly temperature and precipitation across China. For both  
584 species, genotype association was stronger with precipitation parameters together with the  
585 neuropeptide receptor NPR-9 gene adjacent genomic region. The NPR-9 affects foraging behaviour  
586 and nutrient storage (Bendena et al., 2015) and as a consequence development time and fecundity.  
587 Literature tends then to support that local adaptation to diverse levels of aridity could shape mite  
588 responses allowing them to adjust feeding behaviour in accordance with native local climatic  
589 conditions and nutritional quality of the host plants.

590

591 Under a climate change scenario, it is expected that mites will experience harsher drought episodes  
592 with environmental conditions leading to the selection of drought-adapted mites. In agricultural, in-  
593 tensification of damage in humid areas during the first years of drought (see Legrand et al., 2000 for  
594 an example) will probably be limited by physiological costs but progressively lead to adaptation as  
595 suggested by the mite responses in the driest areas of this study. These are important issues to be  
596 taking into account for future strategies of pest management.

597

## 598 **Acknowledgements**

599

600 We thank Judit Linka (NIAB EMR, East Malling, United Kingdom), Lucía Adriana Escudero-Colomar  
601 (IRTA, Estació Experimental Agrícola Mas Badia, Spain), Vassilis Litskas and Menelaos Stavriniades  
602 (Cyprus University of Technology, Cyprus) and Jean-Baptiste Thibord and Cyril Hannon (Arvalis -  
603 Institut du Végétal, France) who helped us for providing mites populations and Nathalie Smit (INRAE  
604 Montpellier) for her statistical advice. This work was funded by the FACCE ERA-NET Plus— FACCE JPI  
605 GENOMITE project through EC and national sources (EC contract 618105), including the French  
606 Agence Nationale de la Recherche (Grant ANR-14-JFAC-0006-01), and the metaprogramme  
607 Adaptation of Agriculture and Forest to Climate Change launched by the French National Institute for  
608 Agricultural Research (INRAE). The works was initiated before 2018 but completed during the  
609 SuperPests grant, supported by the European Union's Horizon2020 research and innovation program  
610 (grant 773 902-SuperPests). RAH was supported by USDA NIFA Hatch project 1012868 during this  
611 work.

612

613

## 614 **Data**

615 Data and statistical analysis are available here

616 <https://doi.org/10.15454/ICM8EF>

## 617 **References**

618

- 619 Alzate A., Bisschop K., Etienne R.S., Bonte D. 2017. Interspecific competition counteracts negative  
620 effects of dispersal on adaptation of an arthropod herbivore to a new host. *Journal of*  
621 *Evolutionary Biology*, 30: 1966-1977.
- 622 Antonio T., Robert Z. Global Aridity Index and Potential Evapotranspiration (ET0) Climate Database v2  
623 [Internet]. Available from:  
624 [https://figshare.com/articles/dataset/Global\\_Aridity\\_Index\\_and\\_Potential\\_Evapotranspiration\\_E](https://figshare.com/articles/dataset/Global_Aridity_Index_and_Potential_Evapotranspiration_ET0_Climate_Database_v2/7504448)  
625 [T0\\_Climate\\_Database\\_v2/7504448](https://figshare.com/articles/dataset/Global_Aridity_Index_and_Potential_Evapotranspiration_ET0_Climate_Database_v2/7504448)
- 626 Auger P., Migeon A., Ueckermann E.A., Tiedt L., Navajas M. 2013. Evidence for synonymy between  
627 *Tetranychus urticae* and *Tetranychus cinnabarinus* (Acari, Prostigmata, Tetranychidae): Review  
628 and new data. *Acarologia*, 53: 383-415.
- 629 Bendena W.G., Boudreau J.R., Papanicolaou T., Maltby M., Tobe S.S., Chin-Sang I.D. (2008) A  
630 *Caenorhabditis elegans* allatostatin/galanin-like receptor NPR-9 inhibits local search behavior in  
631 response to feeding cues. *Proceedings of the National Academy of Sciences*, 105: 1339-1342.
- 632 Boubou A., Migeon A., Roderick G., Navajas M. 2011. Recent emergence and worldwide spread of  
633 the red tomato spider mite, *Tetranychus evansi*: genetic variation and multiple cryptic invasions.  
634 *Biological Invasions*, 13: 81-92.
- 635 Boubou A., Migeon A., Roderick G.K., Auger P., Cornuet J.-M., Magalhães S., Navajas M. 2012. Test of  
636 colonisation scenarios reveals complex invasion history of the red tomato spider mite *Tetranychus*  
637 *evansi*. *Plos One*, 7: e35601.
- 638 Bowden J.J., Høye T.T., Buddle C.M. 2013. Fecundity and sexual size dimorphism of wolf spiders  
639 (Araneae: Lycosidae) along an elevational gradient in the Arctic. *Polar Biology*, 36: 831-836.
- 640 Bowman L.L., Kondrateva E.S., Timofeyev M.A., Yampolsky L.Y. 2018. Temperature gradient affects  
641 differentiation of gene expression and SNP allele frequencies in the dominant Lake Baikal  
642 zooplankton species. *Molecular Ecology*, 27: 2544-2559.
- 643 Chandler L.D., Archer T.L., Ward C.R., Lyle W.M. 1979. Influences of Irrigation Practices on Spider  
644 Mite 1 Densities on Field Corn 2. *Environmental Entomology*, 8: 196-201.
- 645 Chaves M.M., Maroco J.P., Pereira J.S. 2003. Understanding plant responses to drought - from genes  
646 to the whole plant. *Functional Plant Biology*, 30: 239-264.
- 647 Chen L., Sun J.-T., Jin P.-Y., Hoffmann A.A., Bing X.-L., Zhao D.-S., Xue X.-F., Hong X.-Y. (2020)  
648 Population genomic data in spider mites point to a role for local adaptation in shaping range  
649 shifts. *Evolutionary Applications*, 00: 1-15.
- 650 Crozier R.H. 1985. Adaptative consequences of male-haploidy. In: Helle W., Sabelis M.W., (Eds).  
651 *Spider mites. Their biology, natural enemies and control*. Amsterdam. p. 201-222.

- 652 Dale A.G., Frank S.D. 2017. Warming and drought combine to increase pest insect fitness on urban  
653 trees. *Plos One*, 12: e0173844.
- 654 English-Loeb G.M. 1989. Nonlinear responses of spider mites to drought-stressed host plants.  
655 *Ecological Entomology*, 14: 45-55.
- 656 Fick S.E., Hijmans R.J. 2017. WorldClim 2: new 1-km spatial resolution climate surfaces for global land  
657 areas. *International Journal of Climatology*, 37: 4302-4315.
- 658 Gillman J.H., Rieger M.W., Dirr M.A., Braman S.K. 1999. Drought Stress Increases Densities but Not  
659 Populations of Two-spotted Spider Mite on *Buddleia davidii* 'Pink Delight'. 34: 280.
- 660 Hummel I., Pantin F., Sulpice R., Piques M., Rolland G., Dauzat M., Christophe A., Pervent M.,  
661 Bouteillé M., Stitt M. et al. 2010. Arabidopsis Plants Acclimate to Water Deficit at Low Cost  
662 through Changes of Carbon Usage: An Integrated Perspective Using Growth, Metabolite, Enzyme,  
663 and Gene Expression Analysis. *Plant Physiology*, 154: 357-372.
- 664 Kassambara A., Mundt F. 2019. factoextra: Extract and Visualize the Results of Multivariate Data  
665 Analyses. R package version 1.0.6. [Internet]. [cited]. Available from: [https://CRAN.R-](https://CRAN.R-project.org/package=factoextra)  
666 [project.org/package=factoextra](https://CRAN.R-project.org/package=factoextra)
- 667 Kelley A.L., de Rivera C.E., Buckley B.A. 2011. Intraspecific variation in thermotolerance and  
668 morphology of the invasive European green crab, *Carcinus maenas*, on the west coast of North  
669 America. *Journal of Experimental Marine Biology and Ecology*, 409: 70-78.
- 670 Koveos D.S., Kroon A., Veerman A. 1993. Geographic variation of diapause intensity in the spider  
671 mite *Tetranychus urticae*. *Physiological Entomology*, 18: 50-56.
- 672 Lê S., Josse J., Husson F. 2008. FactoMineR: An R Package for Multivariate Analysis. *Journal of*  
673 *Statistical Software*, 25: 1-18.
- 674 Legrand G., Wauters A., Muchembled C., Richard-Molard M. 2000. The common yellow spider mite  
675 (*Tetranychus urticae* Koch) (Acari: Tetranychidea) in sugarbeet in Europe: a new problem. 63e  
676 Congrès Institut International de Recherches Betteravières, Interlaken, Switzerland.
- 677 Litskas V.D., Migeon A., Navajas M., Tixier M.-S., Stavriniades M.C. 2019. Impacts of climate change on  
678 tomato, a notorious pest and its natural enemy: small scale agriculture at higher risk.  
679 *Environmental Research Letters*, 14: 084041.
- 680 Logan J.A., Wollkind D.J., Hoyt S.C., Tanigoshi L.K. 1976. An analytic model for description of  
681 temperature dependent rate phenomena in arthropods. *Environmental Entomology*, 5: 1133-  
682 1140.
- 683 Magalhães S., Forbes M.R., Skoracka A., Osakabe M., Chevillon C., McCoy K.D. 2007. Host race  
684 formation in the Acari. *Experimental and Applied Acarology*, 42: 225-238.

- 685 Meynard C.N., Migeon A., Navajas M. 2013. Uncertainties in predicting species distributions under  
686 climate change: a case study using *Tetranychus evansi* (Acari: Tetranychidae), a widespread  
687 agricultural pest. *Plos One*, 8: e66445.
- 688 Migeon A., Auger P., Hufbauer R., Navajas M. 2015. Genetic traits leading to invasion: plasticity in  
689 cold hardiness explains current distribution of an invasive agricultural pest, *Tetranychus evansi*  
690 (Acari: Tetranychidae). *Biological Invasions*, 17: 2275-2285.
- 691 Migeon A., Dorkeld F. 2019. Spider Mites Web: a comprehensive database for the Tetranychidae  
692 [Internet]. INRA; [cited]. Available from: <http://www.montpellier.inra.fr/CBGP/spmweb>
- 693 Migeon A., Tixier M.-S., Navajas M., Litskas V.D., Stavriniades M.C. 2019. A predator-prey system:  
694 *Phytoseiulus persimilis* (Acari: Phytoseiidae) and *Tetranychus urticae* (Acari: Tetranychidae):  
695 worldwide occurrence datasets. *Acarologia*, 59: 301-307.
- 696 Mitlin D., Beard V.A., Satterthwaite D., Du J. 2019. Unaffordable and Undrinkable: Rethinking Urban  
697 Water Access in the Global South. Washington, DC: World Resources Institute. Working Paper.
- 698 Navajas M., Lagnel J., Gutierrez J., Boursot P. 1998. Species-wide homogeneity of nuclear ribosomal  
699 ITS2 sequences in the spider mite *Tetranychus urticae* contrasts with extensive mitochondrial COI  
700 polymorphism. *Heredity*, 80: 742-752.
- 701 Nikolova I., Georgieva N., Naydenova J. 2014. Development and reproduction of spider mites  
702 *Tetranychus turkestanii* (Acari: Tetranychidae) under water deficit condition in soybeans *Pesticidi i*  
703 *fitomedicina*, 29: 187-195.
- 704 Oloumi-Sadeghi H., Helm C.G., Kogan M., Schoeneweiss D.F. 1988. Effect of water stress on  
705 abundance of twospotted spider mite on soybeans under greenhouse conditions. *Entomologia*  
706 *Experimentalis et Applicata*, 48: 85-90.
- 707 R Core Team R.C. 2018. R: A Language and Environment for Statistical Computing. Vienna, Austria: R  
708 Foundation for Statistical Computing.
- 709 Sadras V.O., Wilson L.J., Lally D.A. 1998. Water Deficit Enhanced Cotton Resistance to Spider Mite  
710 Herbivory. *Annals of Botany*, 81: 273-286.
- 711 Santamaria M.E., Auger P., Martinez M., Migeon A., Castanera P., Diaz I., Navajas M., Ortego F. 2018.  
712 Host plant use by two distinct lineages of the tomato red spider mite, *Tetranychus evansi*,  
713 differing in their distribution range. *Journal of Pest Science*, 91: 169-179.
- 714 Santamaria M.E., Diaz I., Martinez M. 2018. Dehydration stress contributes to the enhancement of  
715 plant defense response and mite performance on barley. *Front. Plant Sci.* 9:458
- 716 Seagraves M.P., Riedell W.E., Lundgren J.G. 2011. Oviposition Preference for Water-Stressed Plants in  
717 *Orius insidiosus* (Hemiptera: Anthocoridae). *J Insect Behav*, 24: 132-143.
- 718 Sengupta S., Cai W. 2019. A Quarter of Humanity Faces Looming Water Crises. *The New York Times*.  
719 New-York.

- 720 Showler A.T. 2013. Water Deficit Stress - Host Plant Nutrient Accumulations and Associations with  
721 Phytophagous Arthropods. In: Vahdati K., Leslie C., (Eds). Abiotic Stress - Plant Responses and  
722 Applications in Agriculture. London: IntechOpen. p. 387-410.
- 723 Stillwell R.C., Blanckenhorn W.U., Teder T., Davidowitz G., Fox C.W. 2010. Sex differences in  
724 phenotypic plasticity affect variation in sexual size dimorphism in insects: from physiology to  
725 evolution. *Annu Rev Entomol*, 55: 227-245.
- 726 Suwa A., Gotoh T. 2006. Geographic variation in diapause induction and mode of diapause in  
727 *Tetranychus pueraricola*. *Journal of Applied Entomology*, 130: 329-335.
- 728 Takafuji A., So P.M., Tsuno N. 1991. Inter- and intra-population variations in diapause attribute of the  
729 two-spotted spider mite, *Tetranychus urticae* Koch, in Japan. *Researches on Population Ecology*,  
730 33: 331-344.
- 731 Trabucco A., Zomer. Global Aridity Index and Potential Evapotranspiration (ET<sub>0</sub>) Climate Database v2  
732 [Internet]. [cited]. Available from:  
733 [https://figshare.com/articles/dataset/Global\\_Aridity\\_Index\\_and\\_Potential\\_Evapotranspiration\\_E](https://figshare.com/articles/dataset/Global_Aridity_Index_and_Potential_Evapotranspiration_ET0_Climate_Database_v2/7504448)  
734 [T0\\_Climate\\_Database\\_v2/7504448](https://figshare.com/articles/dataset/Global_Aridity_Index_and_Potential_Evapotranspiration_ET0_Climate_Database_v2/7504448)
- 735 Van Petegem K.H.P., Boeye J., Stoks R., Bonte D. 2016. Spatial selection and local adaptation jointly  
736 shape life-history evolution during range expansion. *Am. Nat.*, 188: 485-498.
- 737 Venables W.N., Ripley B.D. 2002. *Modern Applied Statistics with S*. New-York: Springer.
- 738 Verslues P.E., Agarwal M., Katiyar-Agarwal S., Zhu J., Zhu J.-K. 2006. Methods and concepts in  
739 quantifying resistance to drought, salt and freezing, abiotic stresses that affect plant water status.  
740 *The Plant Journal*, 45: 523-539.
- 741 Walter J., Hein R., Auge H., Beierkuhnlein C., Löffler S., Reifenrath K., Schädler M., Weber M., Jentsch  
742 A. 2012. How do extreme drought and plant community composition affect host plant  
743 metabolites and herbivore performance? *Arthropod-Plant Interactions*, 6: 15-25.
- 744 Wickham H. 2016. *ggplot2: Elegant Graphics for Data Analysis*. New York: Springer-Verlag.
- 745 Wrensch D.L., Young S.S.Y. 1983. Relationship between Primary and Tertiary Sex Ratio in the Two-  
746 Spotted Spider Mite (Acarina: Tetranychidae). *Annals of the Entomological Society of America*, 76:  
747 786-789.
- 748 Ximénez-Embún M.G., Castañera P., Ortego F. 2017a. Drought stress in tomato increases the  
749 performance of adapted and non-adapted strains of *Tetranychus urticae*. *Journal of Insect*  
750 *Physiology*, 96: 73-81.
- 751 Ximénez-Embún M.G., Glas J.J., Ortego F., Alba J.M., Castañera P., Kant M.R. 2017b. Drought stress  
752 promotes the colonization success of a herbivorous mite that manipulates plant defenses.  
753 *Experimental and Applied Acarology*, 73: 297-315.

- 754 Ximénez-Embún M.G., Ortego F., Castañera P. 2016. Drought-Stressed Tomato Plants Trigger  
755 Bottom–Up Effects on the Invasive Tetranychus evansi. PLoS One, 11: e0145275.
- 756 Yano S., Takafuji A. 2002. Variation in the life history pattern of Tetranychus urticae (Acari:  
757 Tetranychidae) after selection for dispersal. Experimental and Applied Acarology, 27: 1-10.
- 758 Youngman R.R., Barnes M.M. 1986. Interaction of Spider Mites (Acari: Tetranychidae) and Water  
759 Stress on Gas-exchange Rates and Water Potential of Almond Leaves. Environmental Entomology,  
760 15: 594-600.
- 761 Youngman R.R., Sanderson J.P., Barnes M.M. 1988. Life History Parameters of Tetranychus pacificus  
762 McGregor (Acari: Tetranychidae) on Almonds Under Differential Water Stress. Environmental  
763 Entomology, 17: 488-495.
- 764
